# Supplementary material for: The effects of different doses of exercise on pancreatic β-cell function in patients with newly diagnosed type 2 diabetes: study protocol for and rationale behind the “DOSE-EX” multi-arm parallel-group randomised clinical trial
Source: PubMed Central journal article supplement (PMC8017660; doi:10.1186/s13063-021-05207-7), 2021-04-01
Supplement: 13063_2021_5207_MOESM6_ESM.pdf [file 13063_2021_5207_MOESM6_ESM.pdf]

Copenhagen  
March 13<sup>th</sup> 2020

## **DOSE-EX study group response to the COVID-19 suspension of the public sector in Denmark**

Due to the suspension, imposed by the Danish government \*, of activities not related to health care in the public sector in Denmark, inclusion of new participants in the DOSE-EX study is suspended until further notice. Activities for included participants, not yet allocated, has been postponed until further notice.

On behalf of the steering committee

*Mathias Ried-larsen*

Mathias Ried-Larsen, PhD.  
Senior researcher and group leader  
Principal investigator DOSE-EX  
Centre for Physical Activity Research  
Copenhagen University Hospital (Rigshospitalet)  
Denmark  
E-mail: [Mathias.ried-larsen@regionh.dk](mailto:Mathias.ried-larsen@regionh.dk)

\*<https://www.thelocal.dk/20200311/denmark-to-shut-all-schools-and-universities-to-fight-virus> (entry: March 13<sup>th</sup> 2020 09.00 AM)

CENTRE FOR  
PHYSICAL

ACTIVITY RESEARCH
